# Supplementary material for: Pleural Fluid Resolution Is Associated with Improved Survival in Patients with Malignant Pleural Effusion
Source: MDPI journal article supplement (doi:10.3390/life13051163), 2023-05-11
Supplement: s1 [file s1]

Supplemental Figure S1. Causal Diagram for Variables Selected for Models

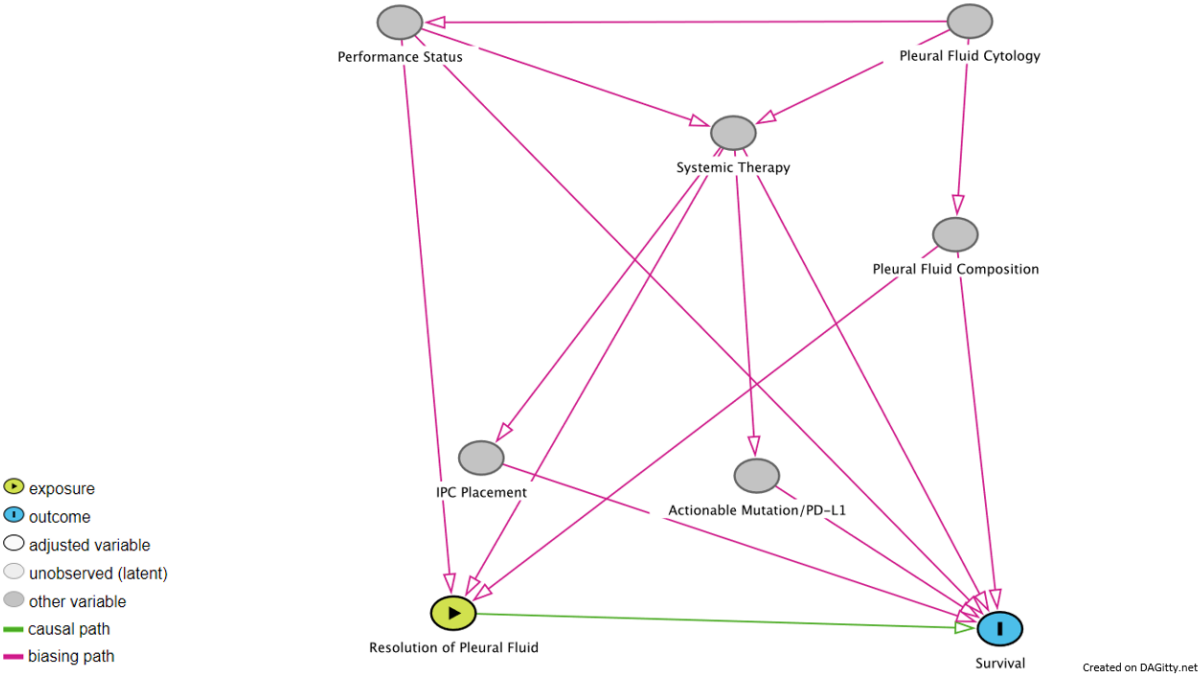

Supplemental Figure S2. Predictor Effect of Possible Confounders

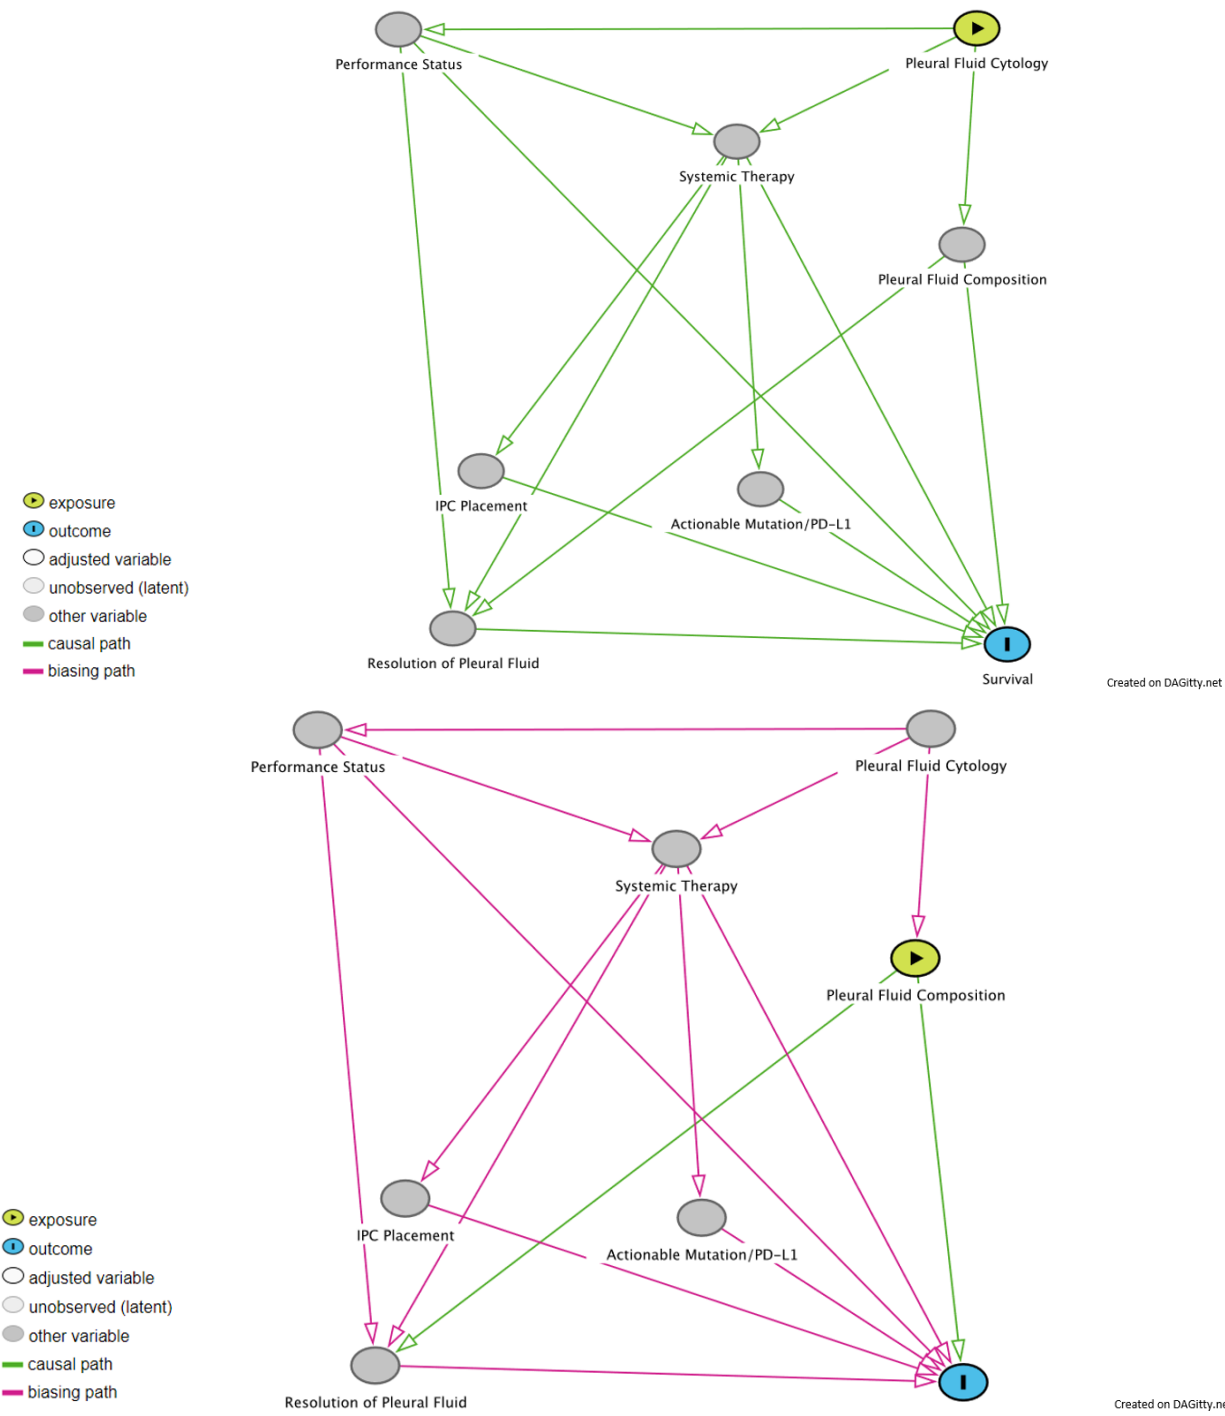

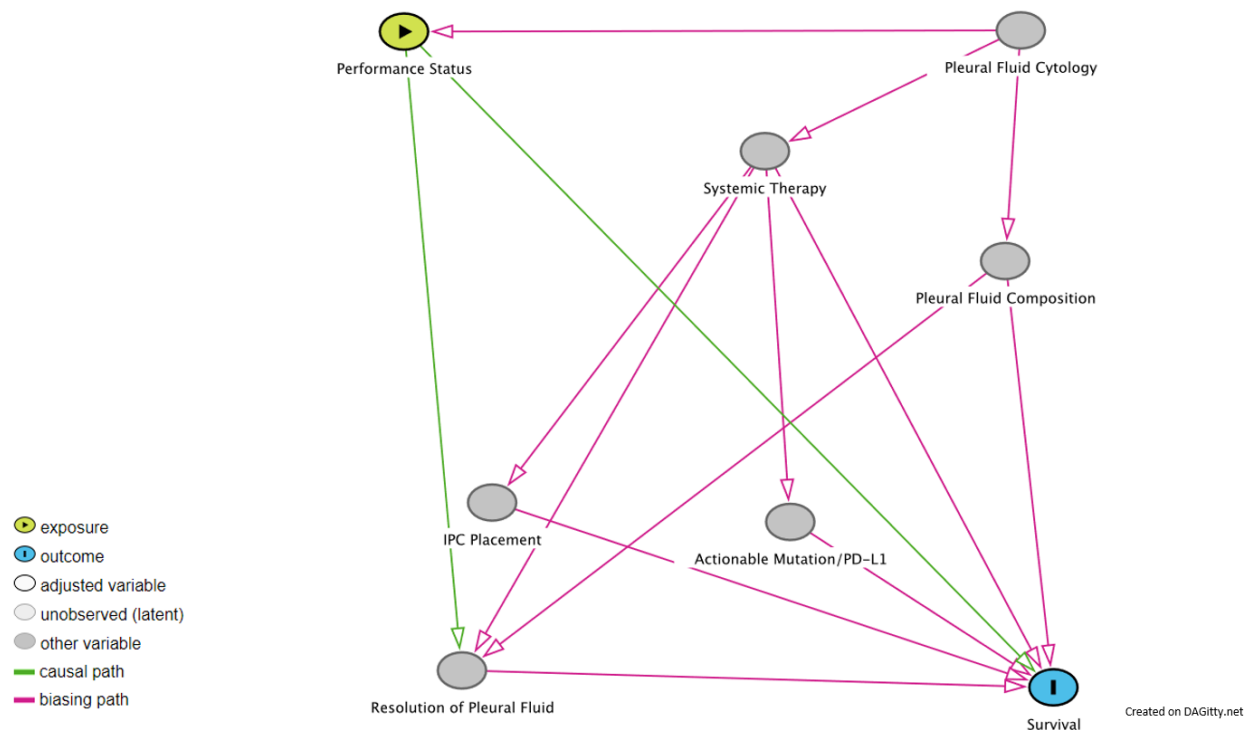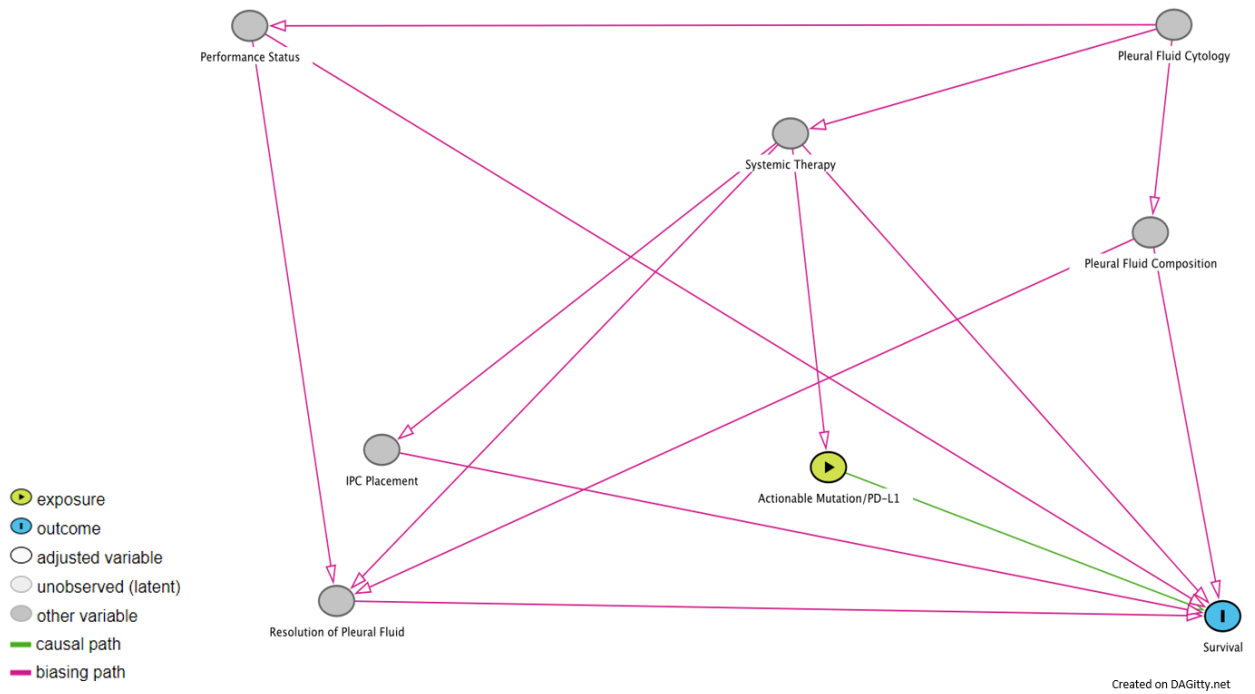

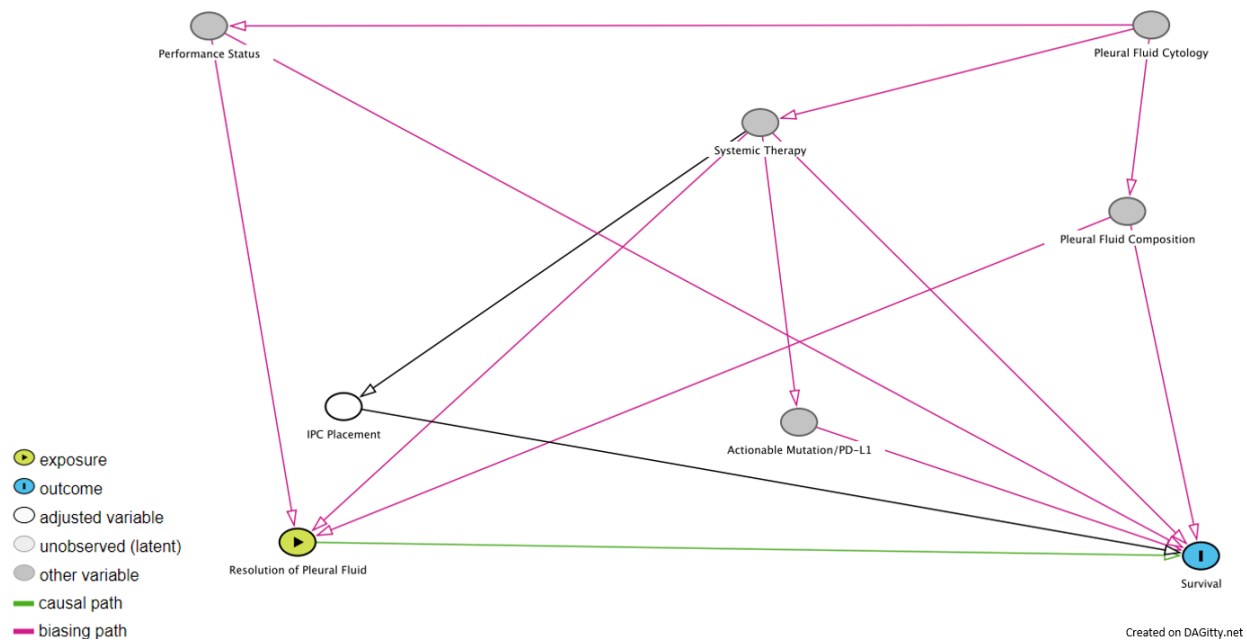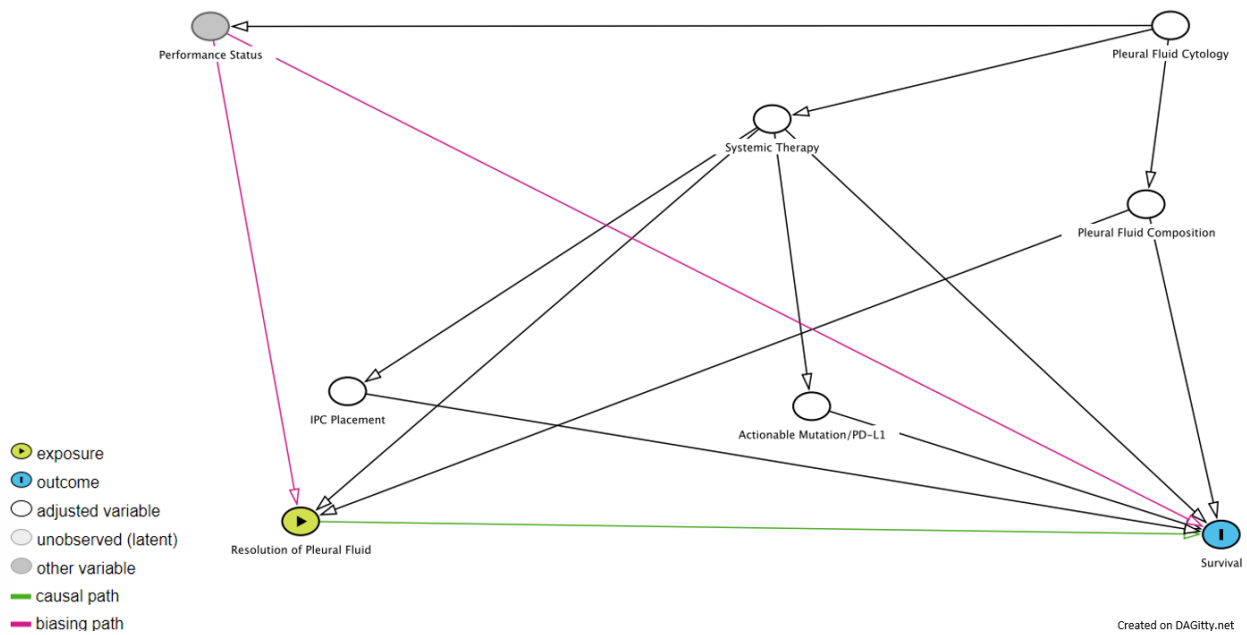

**Supplemental Table S1. Distribution of Baseline Variables Between Groups with Resolution of Pleural Fluid and Non-resolution of Pleural Fluid.**

|                                        | PF Resolution |         | No PF Resolution |         |
|----------------------------------------|---------------|---------|------------------|---------|
| Parameter                              | Frequency     | Percent | Frequency        | Percent |
| Chemotherapy naive                     | 12            | 52.17   | 49               | 49      |
| Chemotherapy non-naive                 | 11            | 47.83   | 51               | 51      |
| Cytotoxic therapy given                | 17            | 73.91   | 65               | 65      |
| Cytotoxic therapy not given            | 6             | 26.09   | 35               | 35      |
| Hormone therapy given                  | 6             | 26.09   | 19               | 19.39   |
| Hormone therapy not given              | 17            | 73.91   | 79               | 80.61   |
| IPC placed                             | 23            | 100     | 40               | 40      |
| IPC not placed                         | .             | .       | 60               | 60      |
| Immunotherapy given                    | 6             | 26.09   | 13               | 13      |
| Immunotherapy not given                | 17            | 73.91   | 87               | 87      |
| Actionable Mutation                    | 15            | 65.22   | 42               | 52.5    |
| No Actionable Mutation                 | 2             | 8.7     | 11               | 13.75   |
| No mutation detected                   | 6             | 26.09   | 27               | 33.75   |
| PD-L1 50% or greater                   | 3             | 60      | 3                | 33.33   |
| PD-L1 less than 50%                    | 2             | 40      | 6                | 66.67   |
| PF Cytology Adenocarcinoma of breast   | 7             | 30.43   | 23               | 23      |
| PF Cytology Lymphoma/leukemia          | 3             | 13.04   | 9                | 9       |
| PF Cytology Non Small Cell Lung Cancer | 1             | 4.35    | 3                | 3       |
| PF Cytology Other                      | 2             | 8.7     | 15               | 15      |
| PF Cytology Small Cell Lung Cancer     | .             | .       | 5                | 5       |

|                                                  |    |       |    |       |
|--------------------------------------------------|----|-------|----|-------|
| PF Urogenital cancer                             | .  | .     | 11 | 11    |
| PF Adenocarcinoma of Lung                        | 10 | 43.48 | 34 | 34    |
| Pleurodesis performed                            | .  | .     | 5  | 5.05  |
| Pleurodesis not performed                        | 23 | 100   | 94 | 94.95 |
| Primary tumor diagnosis Adenocarcinoma of breast | 8  | 34.78 | 25 | 25    |
| Primary tumor diagnosis Lymphoma/leukemia        | 3  | 13.04 | 9  | 9     |
| Primary tumor diagnosis Other                    | 1  | 4.35  | 15 | 15    |
| Primary tumor diagnosis Small Cell Lung Cancer   | 1  | 4.35  | 6  | 6     |
| Primary tumor diagnosis Urogenital cancer        | .  | .     | 9  | 9     |
| Primary tumor diagnosis Adenocarcinoma of lung   | 10 | 43.48 | 36 | 36    |
| Radiation therapy naive                          | 16 | 69.57 | 64 | 64.65 |
| Radiation therapy non-naive                      | 7  | 30.43 | 35 | 35.35 |
| Radiation therapy given                          | 12 | 52.17 | 47 | 47.96 |
| Radiation therapy not given                      | 11 | 47.83 | 51 | 52.04 |
| Sex                                              | 15 | 65.22 | 56 | 56    |
| Sex                                              | 8  | 34.78 | 44 | 44    |
| Currently Smoking                                | 1  | 4.35  | 11 | 11.11 |
| Prior Smoking                                    | 11 | 47.83 | 49 | 49.49 |
| Never Smoked                                     | 11 | 47.83 | 39 | 39.39 |
| Systemic cancer therapy given                    | 23 | 100   | 82 | 82    |
| Systemic cancer therapy not given                | .  | .     | 18 | 18    |

|                            |    |       |    |    |
|----------------------------|----|-------|----|----|
| Targeted therapy given     | 8  | 34.78 | 18 | 18 |
| Targeted therapy not given | 15 | 65.22 | 82 | 82 |
